# Supplementary material
Source: PubMed Central journal article supplement (PMC4545241)
Supplement: NIHMS694571-supplement-supplemental.pdf [file NIHMS694571-supplement-supplemental.pdf]

SUPPLEMENTAL MATERIALS

Table S1. Composition of hydrogel particles

| Monomer                                              | Cationic<br>Weight % | Anionic<br>Weight % |
|------------------------------------------------------|----------------------|---------------------|
| 2-aminoethyl methacrylate HCl (AEM)                  | 10-20                | 0                   |
| PEG <sub>700</sub> diacrylate (PEGDA)                | 10-20                | 10-20               |
| Hydroxy PEG <sub>250</sub> acrylate (HP(250)A)       | 67                   | 77-87               |
| 2,4,6 trimethylbenzoyl diphenylphosphine oxide (TPO) | 1                    | 1                   |
| *DyLight 680 or AlexaFluor 488                       | 2                    | 2                   |
| Total                                                | 100                  | 100                 |

Table S2. Characterization of bare particles

| Mold Dimensions | Size (d.nm)  | PDI           | Zeta Potential<br>(mV) |
|-----------------|--------------|---------------|------------------------|
| 80×180 (-)      | 200.8 ± 11.6 | 0.025 ± 0.017 | -24.6 ± 0.3            |
| 80×2000 (-)     | 595.7 ± 2.6  | 0.133 ± 0.051 | -28.7 ± 0.5            |
| 200×200 (-)     | 251.2 ± 2.1  | 0.128 ± 0.008 | -29.8 ± 0.3            |
| 1 μm (-)        | 1292 ± 189   | -             | -30.0 ± 0.8            |
| 80×180 (+)      | 183.8 ± 2.4  | 0.126 ± 0.017 | 42.0 ± 1.5             |
| 80×2000 (+)     | 370.2 ± 27.7 | 0.069 ± 0.011 | 32.6 ± 1.4             |
| 200×200 (+)     | 256.2 ± 21.8 | 0.104 ± 0.086 | 43.1 ± 1.8             |
| 1 μm (+)        | 2581 ± 6.6   | -             | 22.0 ± 0.7             |

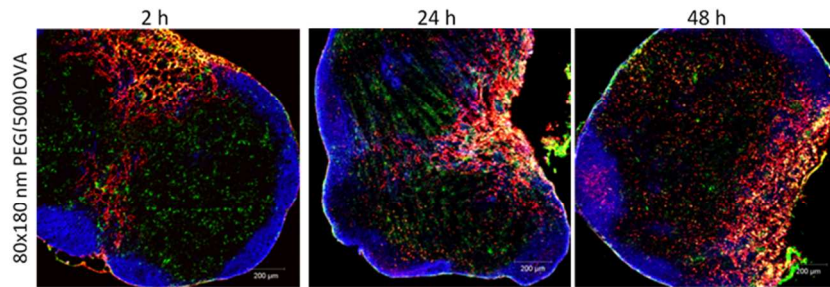

Figure S1. Uptake of 80×180 nm PEG(500)OVA particles by dendritic cells were confirmed by confocal microscopy at various time points post subcutaneous injections of particles. Blue: B cell (B220<sup>+</sup>); green: dendritic cells (CD11c<sup>+</sup>); red: particles.

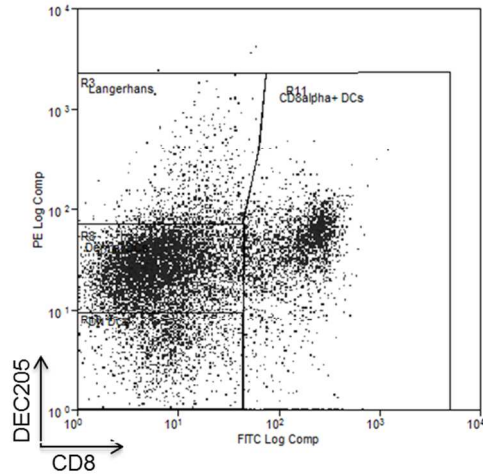

Figure S2. Analysis of LN DC subsets by flow cytometry. Single cell suspension of LNs were stained with anti-mouse CD11c, CD8 $\alpha$  and DEC205. Cells gated on CD11c<sup>+</sup> were shown. The CD11c<sup>+</sup> DC populations are defined as: CD8 $\alpha$ <sup>+</sup> DC (CD11c<sup>+</sup>CD8 $\alpha$ <sup>+</sup>), DN DC (CD11c<sup>+</sup>DEC205<sup>-</sup>CD8 $\alpha$ <sup>-</sup>), langerhan cell (CD11c<sup>+</sup>DEC205<sup>hi</sup>CD8 $\alpha$ <sup>-</sup>), and dermal DC (CD11c<sup>+</sup>DEC205<sup>int</sup>CD8 $\alpha$ <sup>-</sup>).
